# Supplementary material for: The electrochemical inspection of the redox activity of sumanene and its concave CpFe complex
Source: Royal Society of Chemistry journal article supplement (doi:10.1039/b910711h), 2009-01-01
Supplement: b910711h.pdf [file b910711h.pdf]

## SUPPLEMENTARY MATERIAL

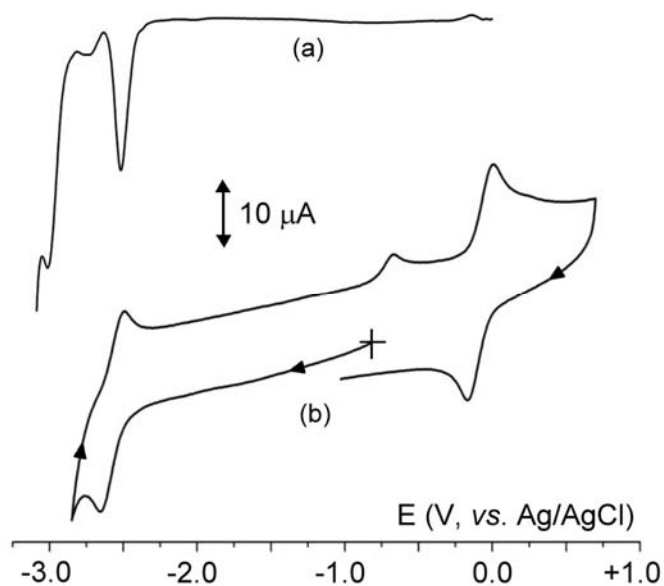

**Figure S1.** (a) Osteryoung square wave voltammogram recorded at a glassy-carbon electrode in DMF solution of C<sub>21</sub>H<sub>12</sub> ( $1.0 \times 10^{-3}$  mol dm<sup>-3</sup>); scan rate 0.1 Vs<sup>-1</sup>. (b) Cyclic voltammogram recorded after the addition of an equimolar amount of (C<sub>5</sub>Me<sub>5</sub>)<sub>2</sub>Fe; scan rate 0.2 Vs<sup>-1</sup>. [NEt<sub>4</sub>][PF<sub>6</sub>] (0.1 mol dm<sup>-3</sup>) supporting electrolyte. T = 253 K.

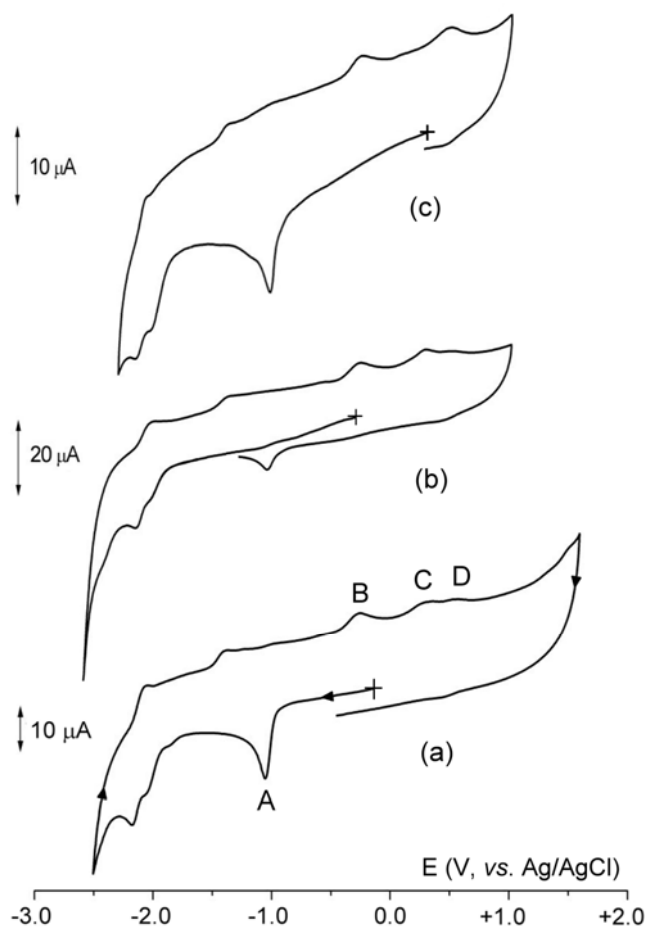

**Figure S2.** Cyclic voltammetric responses recorded at a glassy carbon electrode in DMF solution of  $\mathbf{1}^+\text{PF}_6^-$  ( $0.7 \times 10^{-3} \text{ mol dm}^{-3}$ ) containing  $[\text{NEt}_4][\text{PF}_6]$  ( $0.1 \text{ mol dm}^{-3}$ ) as supporting electrolyte. (a) Original solution; (b) after exhaustive one-electron reduction at a platinum gauge macroelectrode ( $E_w = -1.4 \text{ V}$ ); (c) after the subsequent exhaustive re-oxidation in correspondence of peak D ( $E_w = +0.6 \text{ V}$ ) (which required the consumption of about 0.8 electrons/molecule). Scan rates  $0.2 \text{ Vs}^{-1}$ .  $T = 293 \text{ K}$ .

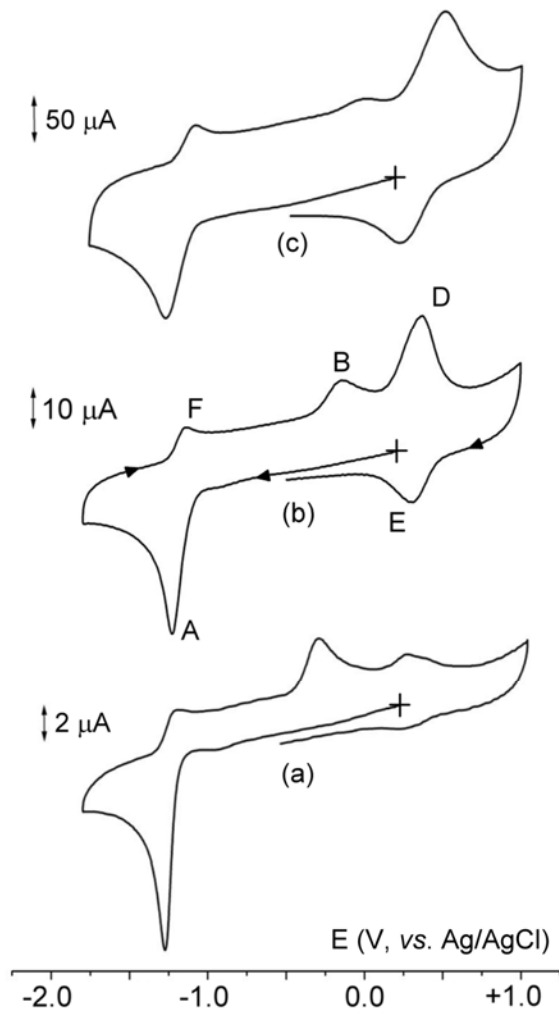

**Figure S3.** Cyclic voltammetric responses recorded at a platinum electrode in DMF solution of  $\mathbf{1}^+\text{PF}_6^-$  ( $0.8 \times 10^{-3} \text{ mol dm}^{-3}$ ).  $[\text{NEt}_4][\text{PF}_6]$  ( $0.1 \text{ mol dm}^{-3}$ ) supporting electrolyte. Scan rates: (a)  $0.2 \text{ Vs}^{-1}$ ; (b)  $2.0 \text{ Vs}^{-1}$ ; (c)  $20.5 \text{ Vs}^{-1}$ .  $T = 253 \text{ K}$ .

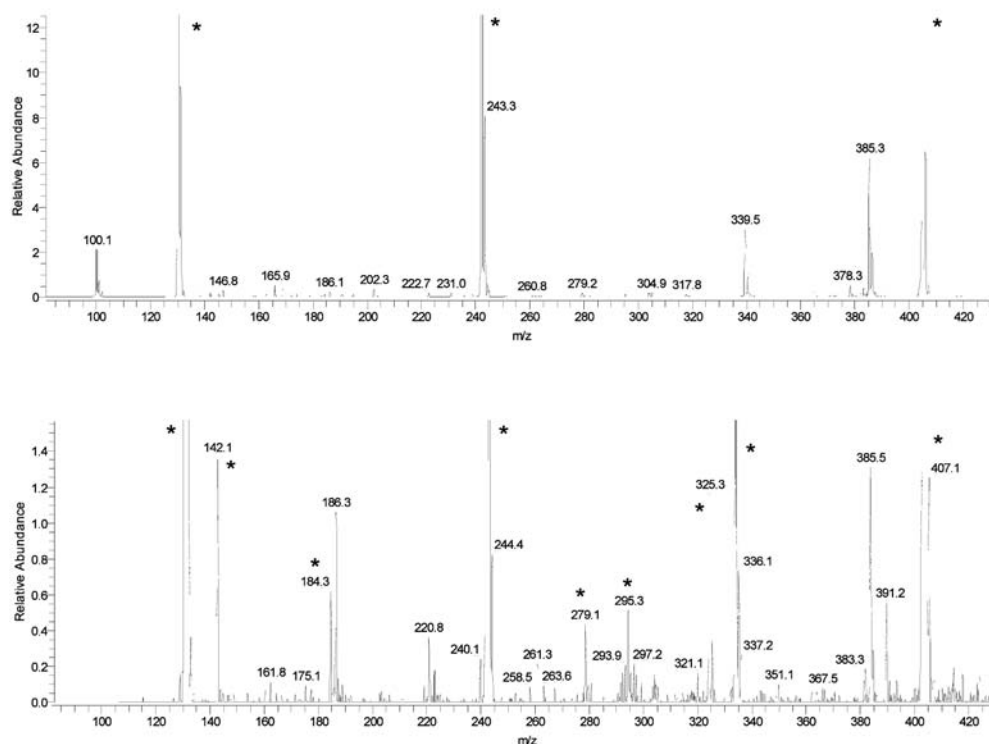

**Figure S4.** ESI(+) mass spectra of the original DMF solution of  $[(\eta^5\text{-C}_5\text{H}_5)\text{Fe}(\eta^6\text{-C}_{21}\text{H}_{12})]^+$  (top) and after exhaustive one-electron reduction (bottom). The asterisked peaks indicate ions arising from the  $[\text{NEt}_4][\text{PF}_6]$  supporting electrolyte.

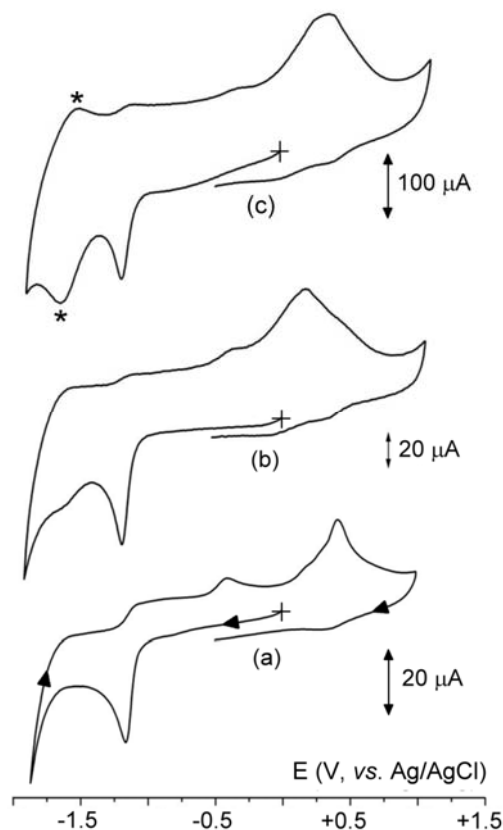

**Figure S5.** Cyclic voltammetric responses recorded at a platinum electrode in MeCN solution of  $\mathbf{1}^+\text{PF}_6^-$  ( $0.8 \times 10^{-3} \text{ mol dm}^{-3}$ ).  $[\text{NEt}_4][\text{PF}_6]$  ( $0.1 \text{ mol dm}^{-3}$ ) supporting electrolyte. Scan rates: (a)  $0.2 \text{ V s}^{-1}$ ; (b)  $0.5 \text{ V s}^{-1}$ ; (c)  $2.00 \text{ V s}^{-1}$ .  $T = 293 \text{ K}$ .
